1 **Multiple freeze-thaw cycles lead to a loss of consistency in poly(A)-**  
2 **enriched RNA sequencing**

3 Benjamin P. Kellman<sup>1,2,\*</sup>, Hratch M. Baghdassarian<sup>1,2,\*</sup>, Tiziano Pramparo<sup>3</sup>, Isaac Shamie<sup>1,2</sup>,  
4 Vahid Gazestani<sup>1,3</sup>, Arjana Begzati<sup>4</sup>, Shengzhong Li<sup>1,6</sup>, Srinivasa Nalabolu<sup>3</sup>, Sarah Murray<sup>5</sup>,  
5 Linda Lopez<sup>3</sup>, Karen Pierce<sup>3</sup>, Eric Courchesne<sup>3</sup>, Nathan E. Lewis<sup>1,6,7</sup>

6 <sup>1</sup> Department of Pediatrics, University of California, San Diego

7 <sup>2</sup> Bioinformatics and Systems Biology Program, University of California San Diego

8 <sup>3</sup> Autism Center of Excellence, Department of Neuroscience, University of California San Diego

9 <sup>4</sup> Department of Medicine, University of California San Diego

10 <sup>5</sup> Department of Pathology, University of California San Diego

11 <sup>6</sup> Department of Bioengineering, University of California San Diego

12 <sup>7</sup> Novo Nordisk Foundation Center for Biosustainability, University of California San Diego

13 \* These authors contributed equally

14 Correspondence to: Nathan E. Lewis, [nlewisres@ucsd.edu](mailto:nlewisres@ucsd.edu)

15 Keywords: RNA-Seq; quality control; freeze-thaw; sample preparation; differential expression

16

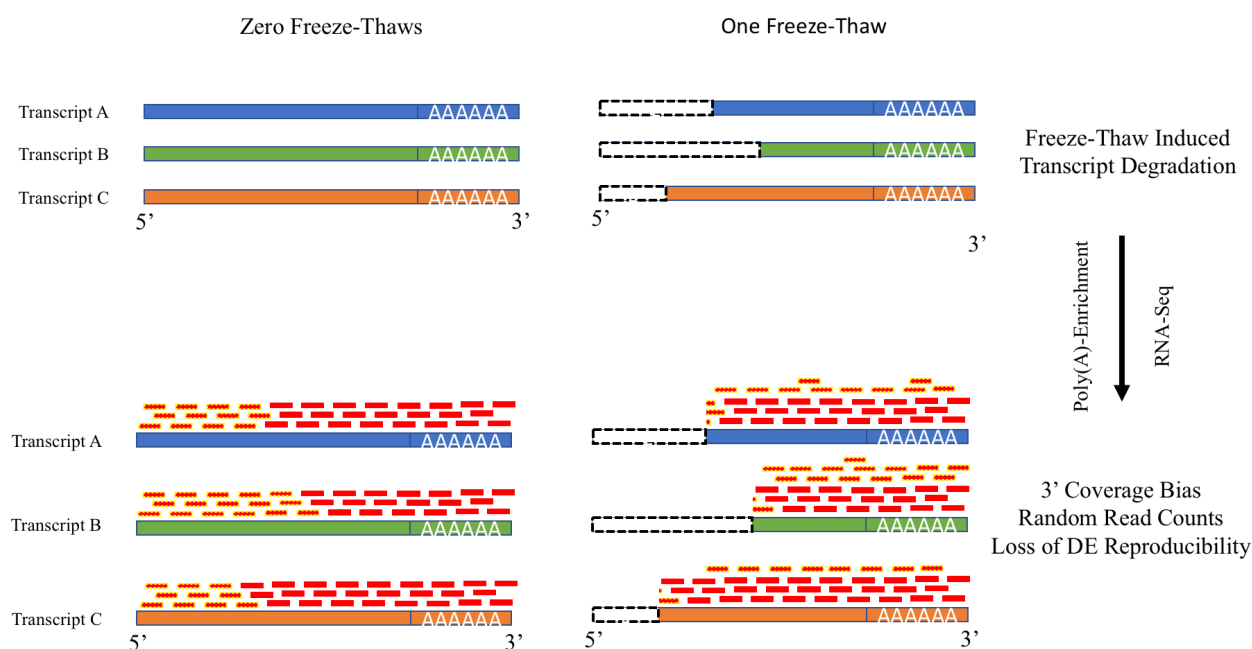

17

## 18 Abstract

19 RNA-Seq is ubiquitous, but depending on the study, sub-optimal sample handling may be  
20 required, resulting in repeated freeze-thaw cycles. However, little is known about how each cycle  
21 impacts downstream analyses, due to a lack of study and known limitations in common RNA  
22 quality metrics, e.g., RIN, at quantifying RNA degradation following repeated freeze-thaws.  
23 Here we quantify the impact of repeated freeze-thaw on the reliability of downstream RNA-Seq  
24 analysis. To do so, we developed a method to estimate the relative noise between technical  
25 replicates independently of RIN. Using this approach we inferred the effect of both RIN and the  
26 number of freeze-thaw cycles on sample noise. We find that RIN is unable to fully account for  
27 the change in sample noise due to freeze-thaw cycles. Additionally, freeze-thaw is detrimental to  
28 sample quality and differential expression (DE) reproducibility, approaching zero after three  
29 cycles for poly(A)-enriched samples, wherein the inherent 3' bias in read coverage is more

30 exacerbated by freeze-thaw cycles, while ribosome-depleted samples are less affected by freeze-  
31 thaws. The use of poly(A)-enrichment for RNA sequencing is pervasive in library preparation of  
32 frozen tissue, and thus, it is important during experimental design and data analysis to consider  
33 the impact of repeated freeze-thaw cycles on reproducibility.

## 34 **Introduction**

35 RNA sequencing (RNA-Seq) is a ubiquitous technology, used to answer a wide range of  
36 biological questions. Methods for aligning, quantifying, normalizing and analyzing expression  
37 data are available through popular packages such as Tophat, STAR, cufflinks, SVA, RUV,  
38 Combat, DESeq2, edgeR, Kallisto, Salmon, BWA-MEM, and many others<sup>1-11</sup>. Each method  
39 aims to accommodate and mitigate the unique challenges presented by RNA-Seq data. Some  
40 approaches attempt to account for characterized variability in RNA-Seq measurements due to  
41 factors such as sequencing depth, gene length, and transcripts' physical characteristics (e.g., GC  
42 content). Others account for “unwanted variance” due to technical, batch, or experimental  
43 variation. Yet, the influence of sample processing, such as tissue lysis and processing time<sup>12-14</sup>, is  
44 not sufficiently characterized such that it can be explicitly controlled. It is important to  
45 adequately characterize noise introduced to RNA-Seq measurements by sample processing steps  
46 to optimize sample quality, account for transcript degradation, and improve the accuracy and  
47 reproducibility of sequencing.

48 Transcript degradation continues after sample acquisition and affects data quality. Sample  
49 storage conditions (e.g. temperature and the use of stabilizing reagents) affect sample quality via  
50 RNA degradation<sup>14,15</sup>. Yet, varying sources of degradation can impact RNA-Seq in different  
51 manners<sup>16</sup>. Degradation introduces variability in signal and can be impacted by sample handling.

52 Non-uniformity in degradation across genes and samples causes inaccurate normalization and  
53 transcript quantification<sup>17</sup>. Poly(A)-enrichment methods are commonly used to separate mRNA  
54 from other highly abundant RNA molecules (e.g., rRNA, tRNA, snoRNAs, etc.), but variable  
55 degradation directly impacts read counts by causing non-uniform transcript coverage<sup>18</sup>. Of  
56 particular interest, freeze-thaw can induce 20% degradation of spike-in standards per cycle, a  
57 factor that may be generalizable to mRNA transcripts<sup>19</sup>. Freeze-thaw cycles increase RNA  
58 degradation by disrupting lysosomes which store RNases, freeing the enzymes to promiscuously  
59 catalyze nuclease activity<sup>20</sup>. Furthermore, partially defrosted crystals create uneven cleaving  
60 pressure on mRNA strands<sup>21,22</sup>. Despite these observations, the extent to which freeze-thaw  
61 negatively impacts count and differential expression in RNA-Seq analyses has not been  
62 comprehensively characterized.

63 Standard sample quality control often relies on RNA integrity number (RIN), which quantifies  
64 the 28S to 18S rRNA ratio<sup>23</sup>. RIN-based quality control approaches rely on a heuristic threshold  
65 to assess sufficient quality<sup>24,25</sup>. RIN-based metrics have known confounders such as transcript  
66 level, and thus have been called into question as an appropriate quality metric<sup>26</sup>. For example,  
67 RIN failed to indicate a decrease in sample quality in lung cancer tissue samples that underwent  
68 five freeze-thaw cycles<sup>27</sup> and, in statistical analyses, failed to correct for the effects of  
69 degradation<sup>28</sup>. Despite this, many studies rely on RIN to correct for and assess sample quality  
70 confounders<sup>16,29,30</sup>. This is especially problematic in the case of transcript degradation because  
71 RIN scores are based on entire samples, while degradation effects can be transcript-  
72 specific<sup>17,31,32</sup>. Furthermore, existing studies on degradation are not simply generalizable to  
73 freeze-thaw, which has distinct and independent effects on sample quality and must be fully  
74 explored as such<sup>16,33</sup>.

75 Here, we tested the susceptibility of poly(A)-enriched RNA-Seq results after multiple freeze-  
76 thaw cycles. We assessed sample quality independently of RIN by simulating read count  
77 variability to capture the noise between technical replicates. We found that each additional  
78 freeze-thaw cycle increased the random counts between technical replicates by approximately  
79 4%. Subsequently, differential expression reproducibility approached zero after three freeze-  
80 thaw cycles. These effects are not captured by RIN. We find that these effects are reflected in  
81 increasing 3' bias in read coverage when combining poly(A)-extraction with freeze-thaw, a  
82 phenomena that appears to be generalizable to publically available datasets.

## 83 **Results**

### 84 **3' bias in read coverage of public datasets is associated to poly(A)-extraction** 85 **and freeze-thaw**

86 To examine the prevalence of bias from repeated freeze-thaw cycles, we search for the presence  
87 of RNA-seq distortion in publically available datasets. Specifically, we analyze the gene-  
88 coverage distribution in samples prepared with either poly(A)-extraction or ribosomal depletion.  
89 Since freeze-thaw enhances transcript degradation and poly(A)-enriched samples select mRNA  
90 by hybridization to the poly(A)-tail, we expect increased read coverage on the 3' end of  
91 transcripts--3' bias--when these two factors are combined. To test this expectation, we compared  
92 gene body coverage from the 5' to 3' end between poly(A)-enrichment and ribosomal depletion  
93 prepared samples with and without freezing. Specifically, we examined the median coverage  
94 percentile, the percentile-normalized nucleotide at which median cumulative coverage for a  
95 given sample is achieved (**Fig. 1a**).

96 We analyzed the gene-coverage distribution in three studies: (1) RNA extraction in previously  
97 frozen solid and liquid tissues, (2) RNA extracted immediately after lysis of cultured cells  
98 without freezing, and (3) RNA extraction in previously frozen tissue from important public tissue  
99 resources.

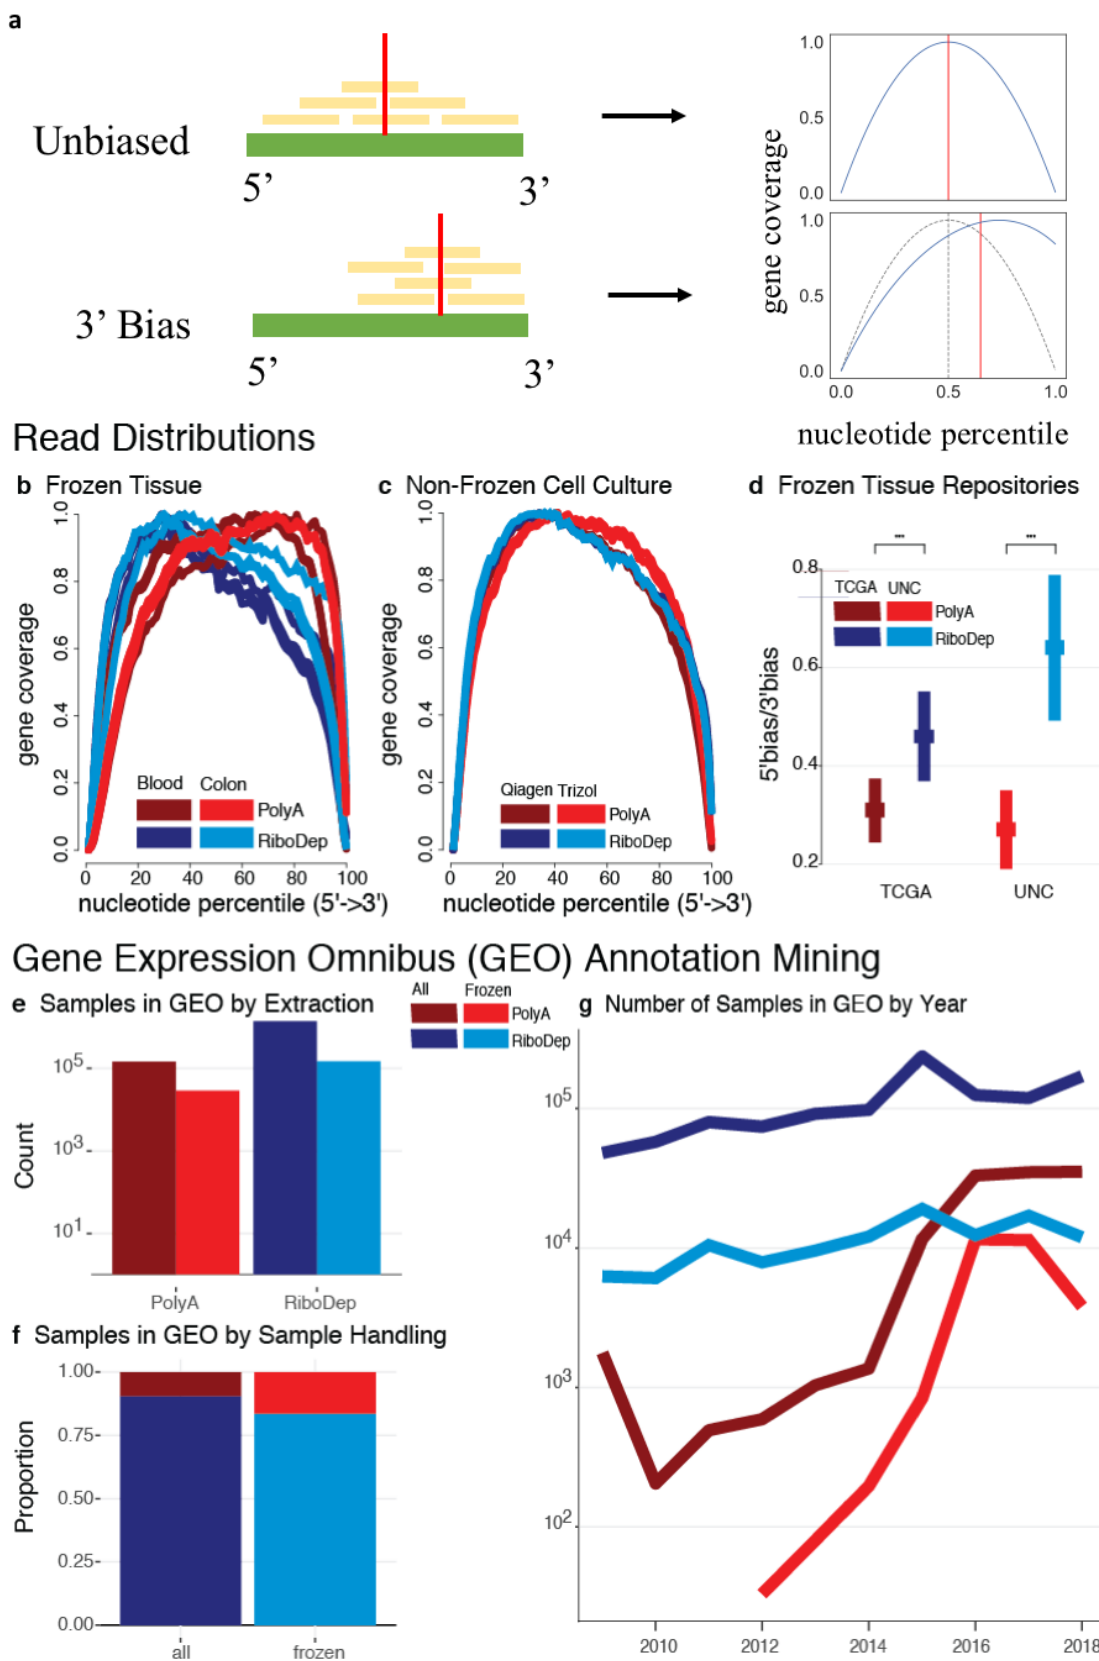

101 **Figure 1: 3' Bias is Exacerbated in Frozen, Poly(A)-extracted Samples Across Multiple Studies: (a)**  
102 *Demonstration for determining median coverage percentile (red vertical line). When coverage is*  
103 *unbiased, reads (yellow) are distributed throughout the entire body of the transcript (green). In the*  
104 *absence of read bias and observing coverage as a function of the nucleotide percentile, we see that*  
105 *cumulative coverage along the transcript reaches 50% half-way through the gene body, at the 50<sup>th</sup>*  
106 *percentile nucleotide. In contrast, given a 3' read bias, there is a shift in the distribution of reads and*  
107 *cumulative coverage reaches 50% at, for example, the 60<sup>th</sup> percentile nucleotide. This results in a*  
108 *rightward shift in median coverage percentile towards the 3' end of the transcript. In the middle row,*  
109 *gene coverage (y-axis) at the  $i^{\text{th}}$  nucleotide percentile from 5' to 3' (x-axis) is displayed for samples that*  
110 *were extracted using either poly(A)-enrichment or ribosomal depletion. Gene body coverage distributions*  
111 *were calculated for (b) for tissue samples that underwent an unspecified number of freeze-thaw cycles*  
112 *and (c) cell-culture samples samples that underwent no freeze-thaw cycles. (d) Comparison of 5' to 3'*  
113 *bias ratio (y-axis) of samples from the TCGA and UNC tissue repositories (x-axis) between extraction*  
114 *methods (two-sample t-test). Quantifying human RNA samples listed in GEO from 2008-2018, and*  
115 *stratifying by those annotated as "frozen", we observe (d) the number of samples prepared with poly(A)-*  
116 *extraction or ribosomal depletion (x-axis) (gray), (f) the proportion of samples extracted using either*  
117 *method, and (g) the change in the number of samples over time.*

118 In the first study<sup>34</sup>, a comparison of the performance of poly(A) and ribosomal depletion in liquid  
119 and solid frozen tissue, we see a significant (one-sided Wilcoxon test,  $p = 0.01591$ ) shift in the  
120 median gene coverage percentile towards the 3' end in the poly(A)-extracted samples (**Fig. 1b**).  
121 Using generalized linear regression, we found that the median coverage percentile of poly(A)-  
122 extracted samples was 3.88% higher (Wald  $p = 0.011$ ) than comparable ribosomal depletion  
123 extracted samples. In the second study<sup>35</sup>, cells were not frozen before extraction and there was a  
124 small and insignificant difference in the 3' bias associated with library preparation (one-sided  
125 Wilcoxon test,  $p = 0.13$ , **Fig. 1c**). While the first two studies extract RNA from tissue and cell-



126 culture respectively--tissue extraction is typically lower quality, they are internally controlled  
127 and therefore comparable. Finally, the third study<sup>36</sup> examines the impact of RNA extraction in  
128 frozen tissue from the UNC and TCGA tumor tissue repositories. We found a significant (two-  
129 sample t-test,  $p < 1e16$ ) decrease in the 5'-to-3' coverage ratio in poly(A)-extracted samples  
130 compared to ribosomal depletion (**Fig. 1d**), indicating an increase in 3' bias. 3' bias was  
131 consistent across RNA extracted from tissue frozen at either repository.

132 Next, we explored how widespread the impact of these observations may be by quantifying the  
133 prevalence of poly(A)-extraction from frozen tissue by examining metadata in the Gene  
134 Expression Omnibus (GEO). With GEOmetadb<sup>37</sup>, we queried all human RNA samples between  
135 2008 and 2018 using either poly(A)-extraction or ribosomal depletion. There are tens to hundred  
136 of thousands of samples annotated as "frozen" for both total and poly(A)-extraction methods  
137 (**Fig. 1e**). We note that this is an order of magnitude less than the total query, a value potentially  
138 diminished by the complexity of the metadata. In samples annotated as "frozen", the frequency  
139 of poly(A) extraction increases from less than 10% to over 25% (**Fig. 1f**) suggesting that the  
140 problematic combination is prevalent and apparently preferred. Finally, stratifying this trend over  
141 time, we see that poly(A)-extraction, as well as the relative proportion of poly(A)-extracted  
142 frozen samples, is increasing in popularity relative to total RNA extraction, where usage has  
143 remained fairly consistent (**Fig. 1g**). Taken together, these results indicate a potential, widespread  
144 distortion in RNA-seq associated with a deleterious interaction between poly(A)-extraction and  
145 freeze-thaw. To explore this potential more formally, the remainder of our analyses focus on a  
146 specific experiment to address this question. Specifically we subjected whole-blood extracted  
147 leukocyte samples--with technical replicates--from autistic or typically developing toddlers to a  
148 varying number of freeze-thaw cycles, which we record along with other sample quality metrics

149 such as RIN.

## 150 **An Additional Freeze-Thaw Cycle Increases Random Read Counts 1.4-Fold**

151 To address the scarcity in quantification of loss in sample quality due to freeze-thaw, we  
152 compare changes in sample quality between technical replicates. We first note that neither RIN  
153 nor TIN capture significant (one-sided Wilcoxon test) decreases in sample quality due to  
154 increased freeze-thaw (**Fig. S1**). Given previous indications that these metrics may not  
155 sufficiently address transcript degradation, we instead measure the introduction of noise—the  
156 randomness in read counts between technical replicates—to samples by freeze-thaw. We  
157 simulated this randomness to reflect the dissimilarity between technical replicates. Since noise  
158 does not rely on RIN, we could compare freeze-thaw and RIN-effects independently.

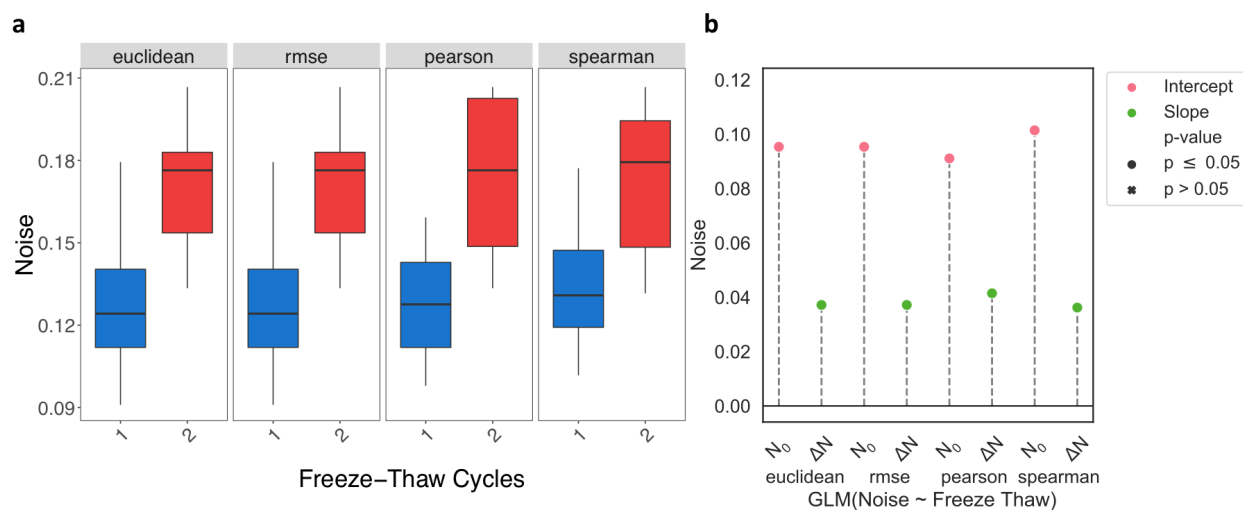

159

160 **Figure 2: Higher Noise in Samples with More Freeze-Thaw Cycles.** *From left to right, noise—*  
161 *the randomness in read counts between technical replicates—is estimated using Euclidean distance,*  
162 *RMSE, Pearson correlation, and Spearman correlation. (a) Box plots of noise for samples that underwent*  
163 *either one or two freeze-thaws. (b) A generalized linear model was used to determine the expected noise*

164 at one freeze-thaw ( $N_0$ , pink) and the expected change in noise with each additional freeze-thaw ( $\Delta N$ ,  
165 green). All estimates are significant ( $p \leq 0.05$ ).

166

167 Median noise increased 1.4-fold from one to two freeze-thaw cycles (one-sided Mann-Whitney  
168 U test,  $p \leq 0.007$ ) on average across all measures (**Fig. 2a**). Noise between technical replicates

169 when samples have only undergone one freeze-thaw was estimated to be 9.11-10.15% (Wald

170 test,  $p \leq 5.77e-7$ ). The expected increase in noise per additional freeze-thaw cycle was estimated

171 to be 3.6-4.1 percentage points (Wald test,  $p \leq 8.12e-3$ ) (**Fig. 2b**).

## 172 RIN Does Not Predict Additional Noise After One Freeze-Thaw Cycle

173 To follow up on our observations that RIN does not sufficiently capture changes in sample

174 quality due to freeze-thaw, we asked whether RIN can reflect the differences in sample quality as

175 measured by noise.

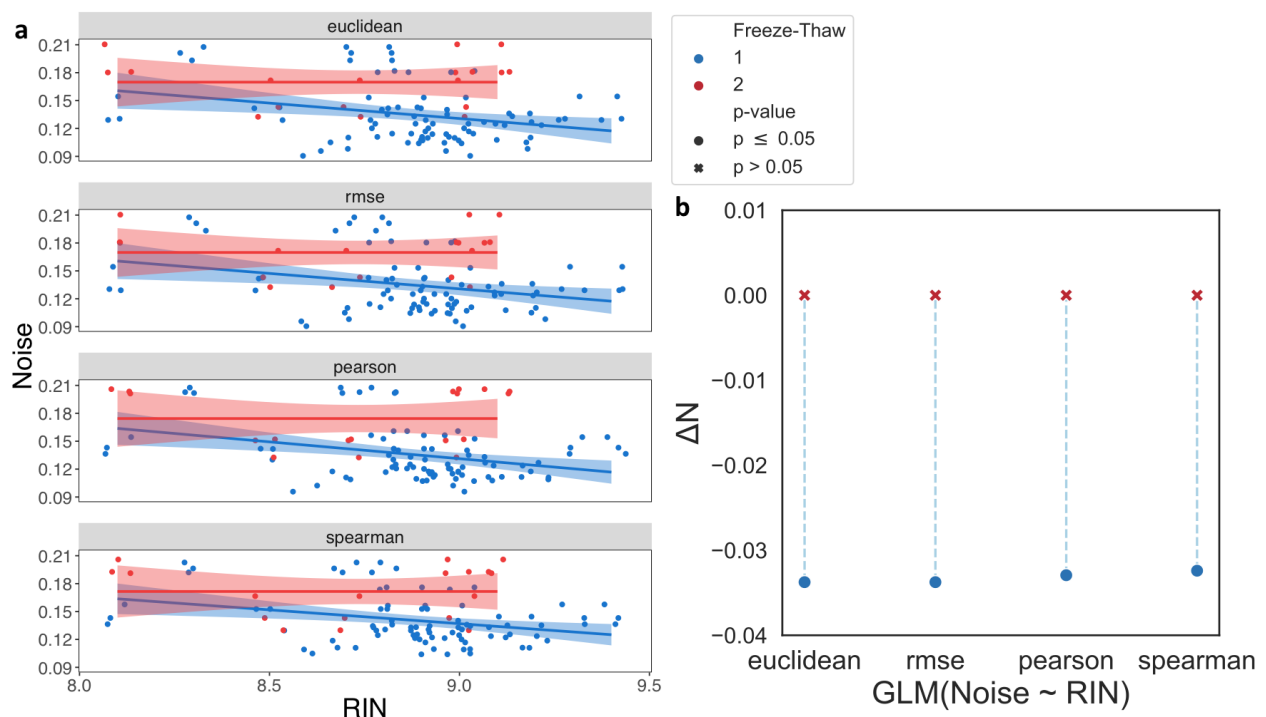

176

177 **Figure 3: Discrepancy in the Relationship Between Noise and RIN due to additional Freeze-**

178 **Thaw.** *Examining the relationship between noise, calculated by Euclidean distance, RMSE, pearson,*  
179 *and spearman correlation, for samples that underwent either one (blue) or two (red) freeze-thaw cycles.*  
180 *(a) Scatter plots comparing noise (y-axis) to RIN (x-axis). The solid lines show a linear regression fit and*  
181 *the shaded regions is the 95% confidence interval for this fit. (b) The expected change in noise due to a*  
182 *one point increase in RIN ( $\Delta N$ , y-axis) estimated by a generalized linear model. Significant estimates ( $p \leq$*   
183 *0.05) are marked by a circle and insignificant estimates are marked by a cross.*

184 When only considering samples that underwent one freeze-thaw, each unit increase in RIN  
185 decreases noise by 3.24-3.38 percentage points for all metrics (Wald test,  $p \leq 6.3e-3$ ) (Fig. **3a-b**).  
186 Yet, when only accounting for samples that underwent two freeze-thaw cycles, noise does not  
187 significantly change as RIN increases. Taken together, these results indicate that while RIN can  
188 be a good measure of noise for samples that underwent one freeze-thaw, it does not capture the  
189 loss in sample quality induced by two freeze-thaw cycles.

190 **Differential Expression Similarity Increases 10.3% in High Quality Samples**

191 Next, we investigated how the introduction of technical variation, noise, impacts downstream  
192 RNA-Seq analysis, specifically, differential expression (DE) analysis. As such, we assessed the  
193 reproducibility of DE results on combinations of samples with varying sample quality. We  
194 compared DE results between subsets of various sizes (4 - 14 samples). We measure  
195 reproducibility using similarity or discordance, based on correlation and dispersion, respectively.  
196 Higher similarity and lower discordance each represent higher reproducibility. We use these  
197 measures to assess differences that arise between subsets consisting of high quality (low freeze-  
198 thaw or high RIN) and low quality (high freeze-thaw or low RIN) samples.

199 We held two expectations regarding the effect of sample quality on DE reproducibility in the  
 200 context of similarity: 1) the reproducibility between subsets with high quality samples should be  
 201 higher than those with low quality samples, and 2) both subset size and sample quality should  
 202 interact to increase the reproducibility of DE analysis; the increase in stability is reflected by a  
 203 higher rate of increase in reproducibility with respect to subset size.

204 As expected, similarity increases with subset size. This is reflected in the upward shift in the  
 205 similarity distribution with increasing subset size (**Fig. S10**) and the estimated 0.02 (Wald test,  $p$   
 206  $= 2.2e-5$ ) increase in similarity per additional sample (**Fig. 4a**); thus, expected similarity would  
 207 increase by 0.20 in a subset with 14 samples over a subset with 4 samples. Regression results for  
 208 each model predicting similarity are reported in **Supplementary Table 4**.

209

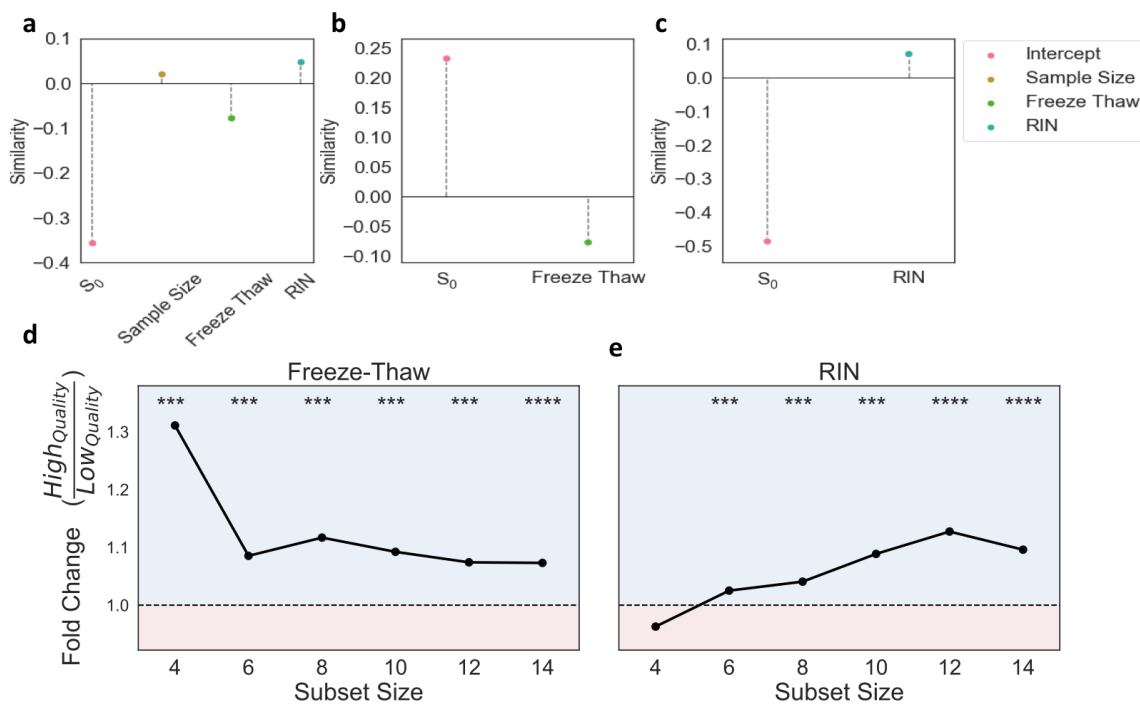

210

211 **Figure 4: Freeze-Thaw and RIN Both Demonstrate Higher Similarity with Increased**

212 **Quality.** *Top panels summarize generalized linear models used to quantify the change in similarity per*  
213 *unit increase in (a) sample size, number of freeze-thaws and RIN combined, (b) only the number of*  
214 *freeze-thaws, and (c) only RIN.  $S_0$  represents the intercept estimate and sample size, freeze-thaw, and RIN*  
215 *represent coefficient estimates. All estimates are significant. Bottom panels demonstrate fold-change in*  
216 *median similarity of high quality subsets with respect to low quality subsets at each subset size. The*  
217 *region shaded in blue (fold-change > 1) indicates instances where the median similarity for high quality*  
218 *is larger than that of low quality. The region shaded in red (fold-change < 1) indicates instances where*  
219 *the median similarity for low quality is larger than that of high quality. Average (d) freeze-thaw or (e)*  
220 *RIN are used to place subset pairs into high or low quality sample bins. Significance (one-sided Mann-*  
221 *Whitney U test) of comparisons in similarity distributions between high and low quality subset pairs are*  
222 *displayed above each subset size.*

223 We tested our first expectation by placing subset pairs into high and low sample quality bins,  
224 defined by either RIN or freeze-thaw, for each subset size and comparing their similarity values.  
225 Regardless of sample quality, DE similarity increases with subset size. Yet, for nearly all subset  
226 sizes, higher quality bins have significantly (one-sided Mann-Whitney U test,  $p \leq 2.8e-17$ )  
227 higher similarity than low quality bins (**Fig. 4e-f**). Across subset sizes, we observed an average  
228 1.13-fold and 1.06-fold increase in similarity from low to high quality samples for freeze-thaw  
229 and RIN, respectively.

230 Similarity significantly (Wald test,  $p \leq 9.2e-3$ ) decreases with the number of freeze-thaws and  
231 increases with RIN when accounting for the effects of sample size (**Fig. 4a-c**), validating our  
232 second expectation. Similarity decreases by 0.077 per additional freeze-thaw cycle (Wald test,  $p$   
233  $= 8.77e-4$ ). Given the estimated similarity of 0.23 for samples that have not undergone freeze-  
234 thaw, this implies that DE reproducibility will approach zero after approximately three freeze-  
235 thaw cycles (**Fig. 4b**). Even when accounting for subset size and the effects of RIN, the

236 estimated decrease in similarity from freeze-thaw is nearly the same--0.078 (Wald test,  $p =$   
237  $8.77e-4$ ); this further corroborated that RIN alone cannot capture the changes in sample quality  
238 due to freeze-thaw. Taken together, these results indicate that higher sample quality increases DE  
239 reproducibility as measured by similarity.

## 240 **Discordance Decreases ~5-fold In High Quality Samples**

241 We further investigated the relationship between DE reproducibility and sample quality using an  
242 effect size sensitive measure of discordance. Specifically, we explored how sample quality  
243 affects the relationship between discordance and the mean-variance standardized effect at each  
244 subset size. In this context, we expected 1) discordance at any given effect size to be lower in  
245 high-quality subsets and 2) the rate of increase in discordance to be lower in high quality subsets  
246 relative to low quality subsets.

247 Corresponding to the regression models used for this analysis, we label our expected discordance  
248 when effect size is zero as  $D_0$  and the change in discordance per unit increase in effect size as  
249  $\Delta D$ . We observed a significant (Wald test,  $p \leq 9.45e-141$ ) decreasing trend in both  $D_0$  and  $\Delta D$   
250 with increasing subset size (**Fig. S11, Supplementary Table 5**).

251 As expected, independent of sample quality,  $\Delta D$  demonstrates an overall decreasing trend with  
252 respect to subset size for both RIN and freeze-thaw. Given freeze-thaw, at a subset size of 6,  
253 there is a 1.1-fold decrease in the value of  $\Delta D$  from low quality subsets to high quality subsets.  
254 The disparity in  $\Delta D$  between high and low sample quality ( $\Delta m = \Delta D_{\text{Low Quality}} / \Delta D_{\text{High Quality}}$ )  
255 increases nearly monotonically through to the subset size of 14, at which point there is a 3.2-fold  
256 decrease; the monotonicity is an indication of the stability of this relation between discordance  
257 and sample quality. This causes notable differences in discordance values, even at low effect

258 sizes (**Fig. 5a**).

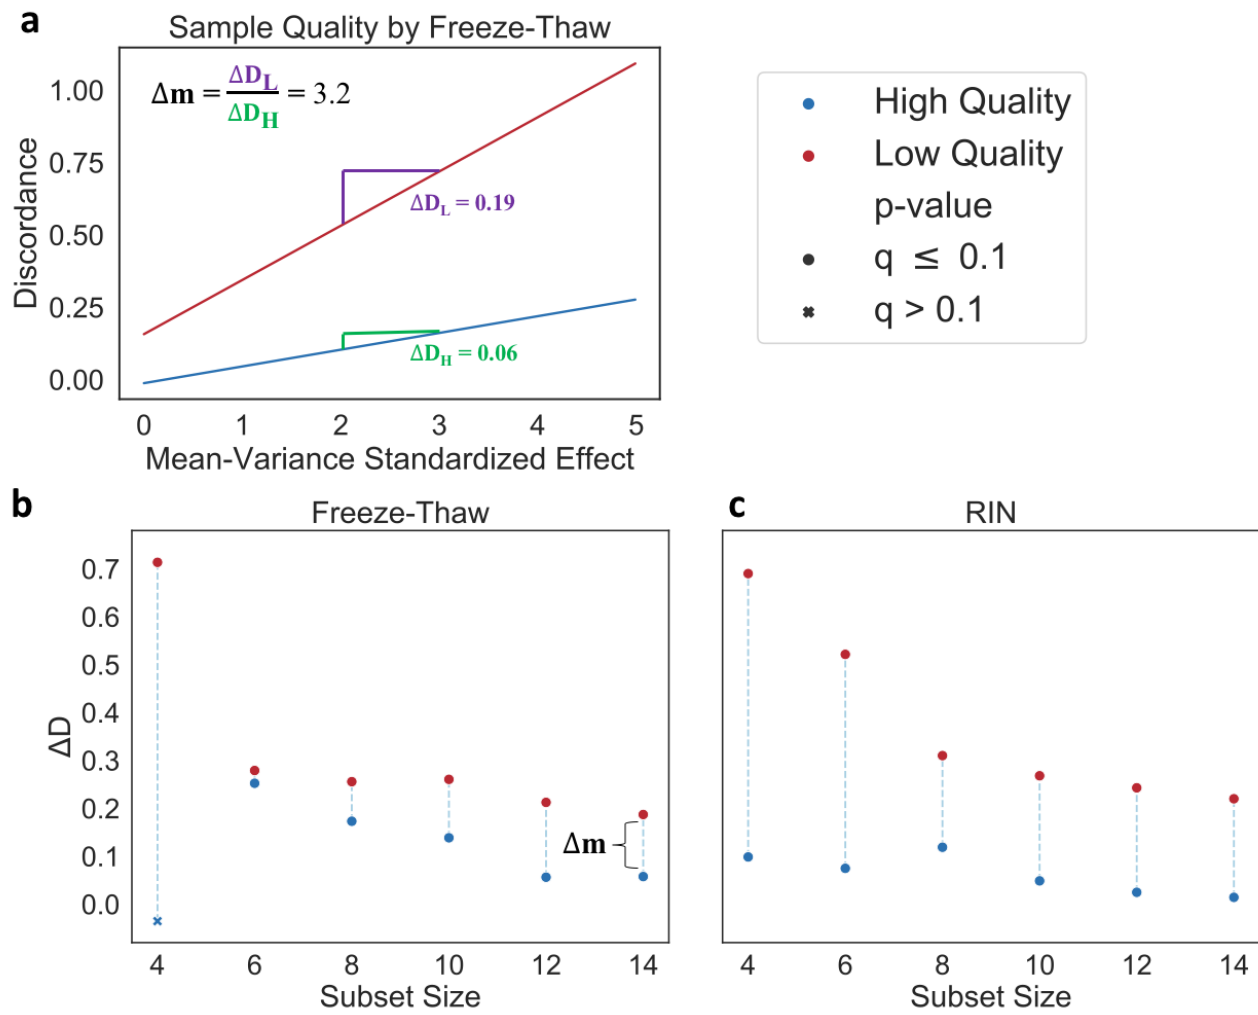

259

260 **Figure 5: Higher Sample Quality has Lower Discordance at Each Subset Size.** *GLM estimates*

261 *of discordance predicted from effect size and subset size at high and low quality subsets at each subset*

262 *size. High sample quality (blue) is compared to low sample quality (red).  $\Delta D$  values represent the change*

263 *in discordance per unit increase in effect size. (a) The predicted discordance with respect to the mean-*

264 *variance standardized effect at a subset size of 14; sample quality is assessed by freeze-thaw. The*

265 *disparity ( $\Delta m$ ) between the change in discordance per unit increase in effect size for high ( $\Delta D_H$ ) and low*

266 *( $\Delta D_L$ ) quality subsets is also displayed. Summary of results for each subset size (x-axis) for sample*

267 *quality represented by either (b) freeze-thaw or (c) RIN. Significant estimates (Wald test, Benjamini-*



268 Hochberg FDR correction,  $q \leq 0.1$ ) are marked by a circle and insignificant estimates are marked by a  
269 cross. For freeze-thaw,  $\Delta m$  corresponding to panel A is also displayed.

270 We estimate discordance with respect to effect size at each subset size and for subsets of either  
271 high and low quality (**Fig. 5a**). Consistent with our expectations,  $D_0$  and  $\Delta D$  are consistently  
272 lower for high quality subsets as compared to low quality subsets for both freeze-thaw and RIN  
273 across all subset sizes (**Fig. 5b-c**). Nearly all estimates are significant after multiple test  
274 correction (Wald test, Benjamini-Hochberg FDR correction,  $q \leq 0.07$ ), with the exception of  
275 those for the smallest subset size for freeze-thaw.

276 Taken together, these results indicate that higher sample quality increases DE reproducibility as  
277 measured by discordance.

### 278 **Additional freeze-thaw cycles show increased 3' bias in poly(A)-enriched but** 279 **not ribosomal depletion samples**

280 Finally, we asked whether repeated freeze-thaw cycles can induce a 3' bias, consistent with the  
281 induction of random reads and the loss of DE reproducibility as well as our initial observation in  
282 the public datasets.

283 Using the median coverage percentile, we found a shift in mRNA coverage towards the 3' end in  
284 the poly(A)-enriched samples relative to ribosomal depletion (**Fig. S13a**). Specifically, the  
285 median coverage percentile for poly(A)-enriched samples is significantly (one-sided Wilcoxon  
286 test,  $p < 2.2e-16$ ) larger than that of ribosome depletion (**Fig. S13b**). Samples prepared with  
287 poly(A)-extraction have more 3' coverage bias compared to ribosomal depletion in both one  
288 (one-sided Wilcoxon test,  $p = 3.5e-15$ ) and two (one-sided Wilcoxon test,  $p = 1.4e-4$ ) freeze-  
289 thaw cycles (**Fig. S13d**). Altogether, this indicates an overall 3' bias of poly(A)-enriched

290 samples, even independently of freeze-thaw (**Fig. S13b**).

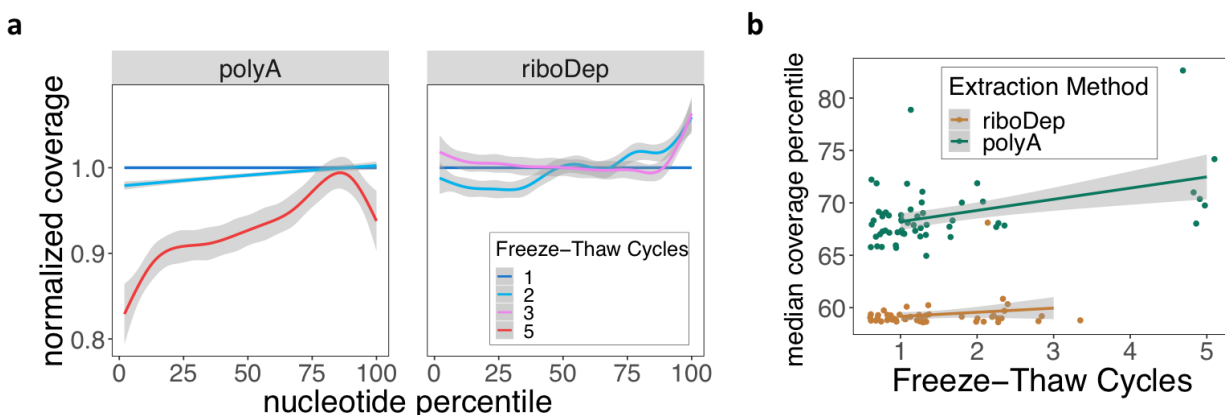

291  
292 **Figure 6: Freeze-Thaw Cycles Exacerbate 3' Bias in poly(A)-enriched samples.** (a) Gene coverage (*y*-  
293 axis) at the  $i^{\text{th}}$  nucleotide percentile (*x*-axis) for samples that underwent 1-5 freeze-thaws and were  
294 extracted using either poly(A)-enrichment or ribosome depletion. Coverage is normalized to samples that  
295 underwent one freeze-thaw. For each sample, coverage is averaged across all genes; samples are  
296 aggregated using generalized additive model smoothing, with shaded regions representing 95%  
297 confidence intervals. (b) Linear model fits comparing the change in median coverage percentile to the  
298 number of freeze-thaw cycles for ribosome depletion (orange) or poly(A)-extraction (green).

299 Crucially, this 3' bias is accentuated when samples are stratified by the number of freeze-thaw  
300 cycles (**Fig. 6a**). We observe a significant increase (Wald test,  $p = 8.3e-4$ ) in median coverage  
301 percentile due to the number of freeze-thaw cycles in poly(A)-enrichment. The increase was not  
302 maintained when was isolated using ribosome depletion (Wald test,  $p = 0.155$ ) (**Fig. 6b**,  
303 **Supplementary Table 7**). For poly(A)-enriched samples, median coverage percentile increases  
304 3.3 percentage points per root freeze-thaw cycle; the square-root of freeze-thaw was used to  
305 stabilize variance. We further demonstrate a dependency of 3' bias on freeze-thaw cycles by  
306 showing that median coverage percentile significantly increases with freeze-thaw in poly(A)-  
307 enriched samples (Kruskal-Wallis test,  $p = 0.01$ ). This 3' bias is particularly apparent after five

308 freeze-thaw cycles (one-sided Wilcoxon test,  $p = 2.4e-3$ ). In contrast, we observe that median  
309 coverage percentile does not significantly change across freeze-thaw cycle counts in ribosomal  
310 depletion (Kruskal-Wallis test,  $p = 0.084$ ) (**Fig. S13c**).

311 Taken together, these analyses indicate that poly(A)-enrichment inherently introduces a 3' bias  
312 in coverage as compared to ribosome depletion, and that this bias is exclusively exacerbated in  
313 poly(A)-enriched samples due to freeze-thaw cycles. Thus, 3' bias may indicate the severity of  
314 freeze-thaw induced signal degradation in poly(A)-extracted samples. If this 3' bias is the root  
315 cause of freeze-thaw induced instability in absolute and differential RNA-seq quantification,  
316 such instabilities may be subverted by substituting poly(A)-selection for ribosomal depletion  
317 during library preparation; such instabilities may be an unnecessary and avoidable  
318 inconvenience.

## 319 **Discussion**

320 Despite the utility and ubiquity of RNA-Seq, many of the confounding elements associated with  
321 the technology are still being characterized. In this work, we demonstrated how one such  
322 confounder--sample freeze-thaw--impacts sample quality and downstream analyses. We  
323 highlighted biases in publically available datasets, and observed an increased 3' bias when both  
324 freeze-thaw and poly(A)-extraction are features of a sample.

325 To gain a comprehensive understanding of this effect, we first simulated technical replication to  
326 measure the noise between technical replicates with different treatments. This allowed us to  
327 examine the impact of freeze-thaw cycles and the ability of RIN to capture those impacts. Next,  
328 we examined the impact of freeze-thaw cycles on the robustness and reproducibility of  
329 differential expression analysis. We found freeze-thaw cycles were substantially detrimental to

330 the stability of gene expression analysis. By our estimates and at these subset sizes,  
331 reproducibility of a differential expression signature approaches zero after three freeze-thaw  
332 cycles (**Supplementary Table 4**). Finally, we demonstrated that poly(A)-enriched samples  
333 demonstrate substantial 3' bias in read coverage with increased freeze-thaw cycles. Our results  
334 have implications with regards to technical variation due to sample handling, the sensitivity of  
335 differential gene expression analysis for frozen tissues and samples, and the utility of RIN.

336 Technical variation in RNA-Seq is substantial and can be attributed to a variety of factors,  
337 including read coverage, mRNA sampling fraction, library preparation batch, GC content, and  
338 sample handling<sup>38,39</sup>. As such, accounting for technical variation has been a major research area  
339 of focus for the past decade<sup>1,2,5,39,40</sup>. Degradation in combination with poly(A)-enrichment is a  
340 known source of variation in RNA-Seq. Yet, before technical variation can be accounted for, it  
341 must be characterized. While studies have looked into the effect of degradation on RNA-Seq,  
342 each mode of degradation impacts sample quality differently, and direct connections between  
343 freeze-thaw and sample quality has mainly been assessed via RIN<sup>16,41,42</sup>.

344 Our simulation of technical replicates helps delineate technical variation due to sample handling-  
345 -specifically, freeze-thaw. Furthermore, the resulting noise provides an estimate for the number  
346 of random read counts associated with a gene. For example, given an average 25 million reads  
347 sequenced per sample, our approximate 4 percentage points difference in noise between one and  
348 two freeze-thaw cycles gives an expected stochasticity in 1 million of those reads; approximating  
349 the number of protein-coding genes in the human genome to be 20-25 thousand<sup>43</sup>, we can expect  
350 a difference of ~40-50 random counts per gene to exist between technical replicates due to a  
351 freeze-thaw cycle (**Supplementary Methods, Fig. S15**). Thus, each freeze-thaw introduces a  
352 non-negligible level of noise to the quantification of gene expression and differential expression

353 of such genes.

354 To check for the possibility that there is a signature which can help correct for freeze-thaw  
355 distortion of RNA-Seq, we attempt to find a group of common DE genes across various DE  
356 methods. We find no such signature (**Supplementary Results**). This is expected, given that a  
357 major source of reduced sample quality due to freeze-thaw is mRNA degradation, which occurs  
358 randomly for each transcript and sample. A possible path forward is to correct for sample  
359 degradation. Several methods have been proposed for this. While some of these methods rely on  
360 RIN or similar metrics (e.g. mRIN, TIN, etc.)<sup>16,44</sup>, others have implemented statistical  
361 frameworks which account for gene-specific biases. DegNorm, for example, accounts for the  
362 gene-specific relative randomness in degradation in its correction approach<sup>17</sup>. Quality surrogate  
363 variable analysis (qSVA) specifically improves differential expression by identifying transcript  
364 features associated with RNA degradation for its correction<sup>28</sup>. Furthermore, there are recent  
365 methods which only assay the 3' end of a transcript and therefore claim robustness in degraded  
366 samples<sup>45</sup>. While these approaches could help account for noise introduced by RNA degradation  
367 during repeated freeze-thaw cycles, they cannot necessarily remedy the associated loss of signal.

368 The effect of freeze-thaw and resultant degradation on RNA-Seq is particularly concerning when  
369 considering differential gene expression analysis. It has been observed that RNA degradation can  
370 induce the apparent differential expression in as many as 56% of genes<sup>44</sup>. To this end, we  
371 quantified this loss of DE reproducibility by measuring similarity and discordance in the context  
372 of sample quality. We found a decrease in reproducibility with both decreasing RIN and  
373 increasing freeze-thaw. Interestingly, for most reproducibility assessments, we observed a  
374 monotonic or near monotonic increase in disparity between low and high quality subsets with  
375 respect to subset size. Similarity demonstrated a larger average magnitude of disparity for freeze-

376 thaw, whereas discordance demonstrated a larger average magnitude of disparity for RIN.

377 Based on our analysis, the utility of RIN in assessing quality when samples undergo freeze-thaw

378 is questionable. The non-uniformity in mRNA degradation<sup>46-49</sup> due to freeze-thaw sheds light on

379 these challenges, since RIN cannot quantify quality at the individual gene level<sup>23</sup>. This is

380 reflected in the fact that samples with RIN > 8 demonstrate degradation<sup>32</sup>. Furthermore, results

381 assessing the effect of freeze-thaw cycles on RIN are inconclusive. While some studies claim

382 RIN can be used to account for degradation effects in RNA-Seq<sup>16</sup>, others suggest it does not

383 sufficiently capture the effects of degradation on sample quality<sup>26,28</sup>. When directly observing the

384 effect of freeze-thaw on RIN, studies have found a negligible effect<sup>12</sup> or can only detect an

385 effect after numerous cycles<sup>27,50</sup>.

386 As such, we re-examined the utility of RIN as a measure of sample quality in relation to our

387 noise estimation of random reads per sample<sup>23</sup>. We found that while noise increases with both

388 decreasing RIN and increasing freeze-thaw, RIN may be an insufficient indicator of quality for

389 samples that have undergone two or more freeze-thaws. Given these results, RIN may not

390 always be a good metric to quantify the difference between technical replicates that have

391 undergone variable sample handling<sup>17,26-28</sup>. We validate noise by confirming that it does not

392 change with input RNA concentration, excepting outliers (**Fig. S12**). Therefore, in the future,

393 noise could be a useful supplement to RIN when technical replicates are present.

394 The fact that our predicted decrease in similarity due to freeze-thaw does not change when

395 incorporating RIN into our model further indicates that RIN alone cannot capture the changes in

396 sample quality due to freeze-thaw. Despite this, RIN is a good indicator of sample quality, if not

397 specifically for freeze-thaw. This is reflected in the fact that RIN validates our expectations for

398 DE reproducibility analysis and the comparable range of noise, similarity, and discordance

399 values between freeze-thaw and RIN assessments.

400 Finally, to confirm our expectation that freeze-thaw decreases sample quality<sup>18–22</sup> and to further  
401 characterize the underlying mechanism, we validated the presence of a 3' bias in coverage. This  
402 builds on our and others' observations that a lower percentage of poly(A)-enriched transcripts  
403 are covered<sup>42</sup>. We compared coverage to ribosome depleted RNA-Seq data, which does not use  
404 3' hybridization to retain transcripts. We find that poly(A)-enrichment does in fact introduce a  
405 strong 3' bias in coverage as compared to ribosome depletion. This bias is further exacerbated  
406 with additional freeze-thaw cycles in poly(A)-enriched but not ribosome depleted samples. This  
407 implies that degradation due to freeze-thaw does not impact RNA-sequencing of ribosome  
408 depleted samples to the extent that it does in poly(A)-enriched samples. In light of our  
409 demonstrations that 3' bias is associated with a substantial increase in noise and a decrease in DE  
410 reproducibility, these findings suggest that RNA-seq from samples that have both been poly(A)-  
411 extracted and undergone freeze-thaw cycles likely has unknown, diminished stability. While not  
412 all studies have technical replicates to estimate noise, the presence of exaggerated 3' bias when  
413 poly(A)-extraction is combined with freeze-thaw can be a simple indicator of RNA-seq  
414 distortion.

## 415 **Conclusion**

416 Altogether, these results indicate that transcriptomics quality control steps cannot rely on RIN  
417 alone for samples that have undergone poly(A)-enrichment and multiple freeze-thaws.  
418 Furthermore, accounting for the effect of freeze-thaw on poly(A)-enriched RNA sequencing is  
419 crucial. poly(A)-enrichment is prevalent for RNA-sequencing, and, in parallel, samples that  
420 undergo multiple freeze-thaws are common in many protocols, especially rare tissues, e.g.,

421 postmortem neural tissue. Yet, there is no clear recommendation to avoid poly(A)-enrichment  
422 following multiple freeze-thaws. Together, these results indicate that ribosomal depletion could  
423 be a better alternative when freeze-thaw is necessary.

## 424 **Declarations**

### 425 **Ethics Approval and Consent to Participate**

426 In this study, we performed transcriptomics analyses of blood samples drawn from male toddlers  
427 with the age range of 1–4 years. Research procedures were approved by the Institutional Review  
428 Board of the University of California, San Diego. Parents of toddlers underwent informed  
429 consent procedures with a psychologist or study coordinator at the time of their child’s  
430 enrollment. Additional details for the recruitment protocol are executed as described in Gazestani  
431 et al.<sup>51</sup>

### 432 **Author contributions**

433 B.P.K., N.E.L., T.P., S.M., and E.C. designed and planned the experiments. T.P., S.N., K.P.,  
434 S.M. and L.L. collected the samples, managed diagnostics, conducted transcriptome assays and  
435 managed the data. B.P.K, H.M.B. and V.G. planned and conducted analyses. I.S. performed  
436 RNA-seq QC. A.B. performed functional enrichment analyses. S.L. wrote the RNA-Seq  
437 processing pipeline. B.P.K., H.M.B, and N.E.L wrote the manuscript. N.E.L. supervised the  
438 project.

### 439 **Acknowledgements and Funding**

440 This work was supported by NIMH R01-MH110558 (E.C., N.E.L., T.P., V.G., S.N., K.P.,L.L.),



441 NIDCD R01-DC016385 (E.C., T.P.), T32GM008806 (H.M.B.), R35 GM119850 (B.P.K., I.S.),  
442 the Simons Foundation (E.C.), and generous funding from the Novo Nordisk Foundation through  
443 Center for Biosustainability at the Technical University of Denmark (NNF10CC1016517 S.L.).

#### 444 **Availability of Data and Materials**

445 The datasets supporting the conclusions of this article are available in the NCBI Sequence Read  
446 Archive repository (PRJNA627540,  
447 [https://www.ncbi.nlm.nih.gov/Traces/study/?acc=PRJNA627540&o=acc\\_s%3Aa](https://www.ncbi.nlm.nih.gov/Traces/study/?acc=PRJNA627540&o=acc_s%3Aa)). Associated  
448 metadata is available in Supplementary Tables 1-2.

#### 449 **Competing Interests**

450 There are no competing interests in this study.

#### 451 **Methods**

##### 452 **Sample Collection and Storage**

453 Blood samples drawn from male toddlers with the age range of 1-4 years were usually taken at  
454 the end of the clinical evaluation sessions. To monitor health status, the temperature of each  
455 toddler was monitored using an ear digital thermometer immediately preceding the blood draw.  
456 The blood draw was scheduled for a different day when the temperature was higher than 37 °C.  
457 Moreover, blood draw was not taken if a toddler had some illness (for example, cold or flu), as  
458 observed by us or stated by parents. We collected 4–6 ml blood into EDTA-coated tubes from  
459 each toddler. Blood leukocytes were captured using LeukoLOCK filters (Ambion). After rinsing  
460 the LeukoLOCK filters with PBS, the filters were flushed with RNAlater (Invitrogen) to stabilize

461 RNA within the intact leukocytes. After RNA stabilization, the LeukoLOCK filters were  
462 immediately placed in a  $-20^{\circ}\text{C}$  freezer. Additional RNA standards were sourced from normal  
463 human peripheral leukocytes pooled from 39 Asian individuals, ages 18 to 47 (Takara/ClonTech:  
464 636592). The RNA standards underwent 1-5 simulated freeze-thaw cycles; 24hrs frozen at  
465  $-80^{\circ}\text{C}$  and 1hr defrosting on ice.

## 466 **RNA Extraction, Sequencing and Quantification**

467 For 47 samples (from 16 individuals), mRNA was extracted using polyA selection with the  
468 TruSeq Stranded mRNA library preparation kit (Illumina). Ribosomal depletion was used to  
469 prepare an additional 52 samples. Relevant metadata regarding polyA-enriched and ribosomal  
470 depleted samples can be found in **Supplementary Table 1-2**. Ribosome depletion prepared  
471 samples used the TruSeq Stranded Total RNA with RiboZero Gold library preparation kit  
472 (Illumina). RNA Integrity Numbers (RIN) were measured using a NanoDrop ND-1000  
473 (ThermoFisher). Poly-A selected samples were sequenced using 50-base pair single end  
474 sequencing on a HiSeq4000 (Illumina) to a depth of 25M reads. The ribo-depletion prepared  
475 libraries were sequenced using 100-base pair paired end sequencing on a HiSeq4000 (Illumina)  
476 to a depth of 50M reads.

477 Fastq files for each sample underwent quality control using FastQC (v0.33). PolyA and adaptor-  
478 trimming were conducted using Trimmomatic<sup>52</sup>. Reads were aligned to the gencode annotated  
479 (v25) human reference genome (GRCh38) using STAR (v2.4.0)<sup>7</sup>. Alignments were processed to  
480 sorted SAM files using SAMtools (v1.7)<sup>53</sup>. Finally, HTSeq using default settings (v0.6.1) was  
481 used to quantify reads<sup>53,54</sup>.

## 482 **Estimation of noise between technical replicates**

483 To estimate the noise between technical replicates of the same individual blood samples, we  
484 simulate random loss and gain of reads (**Fig. S2**). One technical replicate was chosen as the  
485 “reference” replicate, making the other technical replicate the “target” replicate. Specifically, we  
486 designated replicates that have undergone one freeze-thaw as the reference, and those that  
487 underwent two freeze-thaw cycles as the target. The dissimilarity between replicates is measured  
488 by one of four metrics (Euclidean distance, RMSE, Pearson correlation, and Spearman  
489 correlation). We iteratively add and remove random reads to the reference replicate until the  
490 dissimilarity between the simulated replicate and the reference replicate was equal to the  
491 dissimilarity between a target replicate and the reference replicate (**Fig. S3, Figure S2**). We  
492 define the noise between the reference and target replicate as the fraction of reads added or  
493 removed per total reads in the reference replicate to achieve the aforementioned level of  
494 dissimilarity. We represent this as a percentage, e.g. 5% noise between a reference and target  
495 replicate can be interpreted as 5% randomness between their reads. For additional details on  
496 noise simulation, see Supplementary Methods.

## 497 **Measuring the Effect of Sample Quality on Noise**

498 To measure the association between noise and sample quality metrics (number of freeze-thaw  
499 cycles, input RNA concentrations, and RNA integrity number), we used a generalized linear  
500 model (GLM). The significance of the model parameters is determined by the Wald test. All  
501 results are reported in **Supplementary Table 3**.

502 For each model, to mitigate the contribution of potential confounding variables, samples with  
503 input RNA concentrations in the top and bottom 5% ( $|z| \geq 1.645$ ) were removed, decreasing the

504 total number of samples from 47 to 41. For noise prediction from concentration, samples with  
505 more than one freeze-thaw were also excluded, decreasing the total number of samples to 35.  
506 Noise prediction from RIN was run separately for samples that had undergone one freeze-thaw  
507 and samples that had undergone two freeze-thaws.

## 508 **Differential Expression Analysis**

509 We assess whether the observed sample qualities (freeze-thaw and RIN) have an impact on  
510 differential expression (DE) reproducibility using a bootstrapping approach. DE was run on  
511 random sample subsets of varying sizes (**Fig. S4**). Before subsetting, we filtered our expression  
512 matrix for genes with an average count  $\leq 20$  across all samples. This reduced the number of  
513 genes from 10,028 to 4,520. The total number of samples considered was 46 when disregarding  
514 samples that were industry standards, were not assigned to either an ASD or TD indication, or  
515 did not have a recorded sample quality (RIN or freeze-thaw) value.

516 We generated subsets containing  $N = 4-14$  samples. For each subset size  $N$ , we generated 2,000  
517 unique subsets. Each subset had an equal number of TD or ASD samples. Additionally, only one  
518 replicate from each blood sample could be included. These requirements limited our subset size  
519 to a maximum of 14 samples.

520 DE between ASD and TD subjects was conducted using DESeq2<sup>1</sup>. **Fig. S10** summarizes DE  
521 results for all subsets. To account for potential confounders, we used RUV<sup>5</sup>. Specifically, we use  
522 a set of “in-silico empirical” negative control genes, including all but the top 5,000 differentially  
523 expressed genes as described in section 2.4 of the documentation for RUVseq  
524 (<http://bioconductor.org/packages/release/bioc/vignettes/RUVSeq/inst/doc/RUVSeq.pdf>). We  
525 check that RUV produces consistent results with previous Autism leukocyte gene expression

526 signatures<sup>51,55</sup>, see **Supplementary Results**.

## 527 **Similarity to Assess Differential Expression Reproducibility**

528 To assess DE reproducibility, we measure the similarity in log-fold-change (LFC) values  
529 between DE runs. Similarity is calculated as the pairwise spearman correlation of LFC between  
530 all subsets of the same size (**Fig. S6**). Genes with a median base mean (the mean of counts of all  
531 samples, normalizing for sequencing depth) or median LFC in the bottom 10<sup>th</sup> percentile across  
532 all subsets were excluded, filtering for low magnitude effects (**Fig. S5**).

533 Average RIN and freeze-thaw were measured for all subset pairs. Resulting distributions for all  
534 collected values from similarity analyses are displayed in **Fig. S7**.

535 Next, subsets of each size were split into two quantile bins for each quality metric separately.  
536 High sample quality bins (low freeze-thaw or high RIN) were compared to low sample quality  
537 bins. High sample quality subsets were tested for higher similarity than low sample quality bins  
538 using a one-sided Mann-Whitney U test.

539 Additionally, three generalized linear models (GLMs) were fit to quantify the contribution of  
540 sample quality metrics to the change in similarity for DE results across subsets. We fit one model  
541 to predict similarity from freeze-thaw and RIN, while also accounting for the improvement in  
542 reproducibility due to increase in subset size (Similarity ~ Freeze-Thaw + RIN + Subset Size).  
543 We also fit two models predicting similarity from freeze-thaw or RIN alone.

## 544 **Discordance to Assess Differential Expression Reproducibility**

545 We adapted a measure of concordance to measure discordance, or the lack of reproducibility,  
546 between differential expression results<sup>56</sup>. Average RIN and freeze-thaw were calculated for each

547 subset (**Fig. S8-9**). Subsets for each subset size were split into two quantile bins for either quality  
548 metric (RIN and freeze-thaw). Genes with a median base mean across all subsets in the bottom  
549 tenth percentile were excluded from the analysis (**Fig. S5**).

550 We do not use the original concordance at the top (CAT) metric because we are not comparing  
551 our results to a gold standard dataset. Instead, we use gene-wise LFC standard deviation across  
552 subsets as a measure of discordance. Thus, the average LFC for each gene across DE runs is  
553 analogous to the gold standard, and the dispersion from this average indicates a lack of  
554 reproducibility. At each combination of subset size and quality bins, we calculate discordance  
555 and compare it to the gene-wise median effect size (**Fig. S8**). We measure effect size as the  
556 mean-variance standardized effect<sup>1</sup>. This and two additional effect size metrics (Cohen's d and  
557 absolute median LFC) we use are further described in **Fig. S9**. Results for all three effect size  
558 metrics reflect similar trends and can be found in **Supplementary Tables 5-6**.

559 We used a GLM to predict discordance from effect size at each subset size. Additionally, in a  
560 separate GLM, we account for the interaction between effect size and sample quality  
561 (Discordance ~ Effect Size x Sample Quality) at each subset size. Here, sample quality is a  
562 dummy variable, assuming a value of 0 for low quality and 1 for high quality. We did not  
563 include a term for subset size because regressions were fit within each subset size.

## 564 **Read Coverage Bias**

565 The distribution of read coverage over each gene body was measured using  
566 *geneBody\_coverage.py* from the *RSeQC* (v3.0.0) package<sup>57</sup>. We measure this coverage ranging  
567 from the 0<sup>th</sup> percentile (5' end) to the 100<sup>th</sup> percentile (3' end) nucleotide. The *i*<sup>th</sup> percentile  
568 nucleotide is calculated as  $nucleotide_i / length_{gene}$ . Coverage at the *i*<sup>th</sup> percentile nucleotide is

569 normalized across all genes within a sample.

570 For a given sample, the median coverage percentile is defined as the nucleotide percentile at  
571 which median cumulative coverage is achieved; cumulative coverage is aggregated from the 5'  
572 end to the 3' end. The larger the median coverage percentile value, the larger the 3' bias in  
573 coverage. We include 9 industry standards to our analysis--six of which had undergone five  
574 freeze-thaw cycles and three of which had undergone one freeze-thaw cycle--to explore the  
575 impact at higher freeze-thaw counts. We also include ribosomal depletion extracted samples as a  
576 negative control.

577 We extended this read coverage bias to three additional datasets, all of which contained both  
578 poly(A)-extracted and ribosomal depletion extracted samples. The first dataset (PRJNA427184)  
579 contains samples for liquid and solid frozen tissue <sup>34</sup>. The second (PRJEB4197) contains  
580 HEK293 samples that explicitly never underwent freeze-thaw cycles <sup>35</sup>. The third  
581 (phs000676.v1.p1) contains frozen tissue samples from the UNC and TCG tumor tissue  
582 repositories <sup>36</sup>. For the first two datasets, fastq files were aligned using STAR and gene body  
583 coverage was calculated from alignments using RSeQC as previously described. We did not  
584 directly analyze the raw files from TCGA or UNC, but instead reanalyzed the reported 5' to 3'  
585 bias ratios. This ratio is similar to the inverse of the median coverage percentile: the smaller it is,  
586 the larger the 3' bias in read coverage.

587

## 588 **References**

- 589 1. Love, M. I., Huber, W. & Anders, S. Moderated estimation of fold change and dispersion  
590 for RNA-seq data with DESeq2. *Genome Biol.* **15**, 550 (2014).
- 591 2. Robinson, M. D., McCarthy, D. J. & Smyth, G. K. edgeR: a Bioconductor package for  
592 differential expression analysis of digital gene expression data. *Bioinformatics* **26**, 139  
593 (2010).
- 594 3. Trapnell, C. *et al.* Differential gene and transcript expression analysis of RNA-seq  
595 experiments with TopHat and Cufflinks. *Nat. Protoc.* **7**, 562–578 (2012).
- 596 4. Leek, J. T. & Storey, J. D. Capturing Heterogeneity in Gene Expression Studies by  
597 Surrogate Variable Analysis. *PLoS Genet.* **3**, e161 (2007).
- 598 5. Risso, D., Ngai, J., Speed, T. P. & Dudoit, S. Normalization of RNA-seq data using factor  
599 analysis of control genes or samples. *Nat. Biotechnol.* **32**, 896–902 (2014).
- 600 6. Johnson, W. E., Li, C. & Rabinovic, A. Adjusting batch effects in microarray expression  
601 data using empirical Bayes methods. *Biostatistics* **8**, 118–127 (2007).
- 602 7. Dobin, A. *et al.* STAR: ultrafast universal RNA-seq aligner. *Bioinformatics* **29**, 15 (2013).
- 603 8. Conesa, A. *et al.* A survey of best practices for RNA-seq data analysis. *Genome Biol.* **17**, 1–  
604 19 (2016).
- 605 9. Bray, N. L., Pimentel, H., Melsted, P. & Pachter, L. Near-optimal probabilistic RNA-seq  
606 quantification. *Nat. Biotechnol.* **34**, 525–527 (2016).
- 607 10. Patro, R., Duggal, G., Love, M. I., Irizarry, R. A. & Kingsford, C. Salmon provides fast and  
608 bias-aware quantification of transcript expression. *Nat. Methods* **14**, 417–419 (2017).
- 609 11. Li, H. Aligning sequence reads, clone sequences and assembly contigs with BWA-MEM.  
610 (2013).



- 611 12. Jun, E. *et al.* Method Optimization for Extracting High-Quality RNA From the Human  
612 Pancreas Tissue. *Transl. Oncol.* **11**, 800–807 (2018).
- 613 13. Passow, C. N. *et al.* RNAlater and flash freezing storage methods nonrandomly influence  
614 observed gene expression in RNAseq experiments. *bioRxiv* 379834 (2018)  
615 doi:10.1101/379834.
- 616 14. Micke, P. *et al.* Biobanking of fresh frozen tissue: RNA is stable in nonfixed surgical  
617 specimens. *Lab. Invest.* **86**, 202–211 (2006).
- 618 15. Ohmomo, H. *et al.* Reduction of Systematic Bias in Transcriptome Data from Human  
619 Peripheral Blood Mononuclear Cells for Transportation and Biobanking. *PLoS One* **9**,  
620 (2014).
- 621 16. Romero, I. G., Pai, A. A., Tung, J. & Gilad, Y. RNA-seq: impact of RNA degradation on  
622 transcript quantification. *BMC Biol.* **12**, 42 (2014).
- 623 17. Xiong, B., Yang, Y., Fineis, F. R. & Wang, J. P. DegNorm: normalization of generalized  
624 transcript degradation improves accuracy in RNA-seq analysis. *Genome Biol.* **20**, 75–75  
625 (2019).
- 626 18. Li, S. *et al.* Multi-platform assessment of transcriptome profiling using RNA-seq in the  
627 ABRF next-generation sequencing study. *Nat. Biotechnol.* **32**, 915–925 (2014).
- 628 19. Svensson, V. *et al.* Power analysis of single-cell RNA-sequencing experiments. *Nat.*  
629 *Methods* **14**, 381–387 (2017).
- 630 20. Locksley E. McGann, Hongyou Yang, Michele Walterson. Manifestations of cell damage  
631 after freezing and thawing. *Cryobiology* **25**, 178–185 (1988).
- 632 21. Röder, B., Frühwirth, K., Vogl, C., Wagner, M. & Rossmanith, P. Impact of long-term  
633 storage on stability of standard DNA for nucleic acid-based methods. *J. Clin. Microbiol.* **48**,

- 634 4260–4262 (2010).
- 635 22. Shao, W., Khin, S. & Kopp, W. C. Characterization of effect of repeated freeze and thaw  
636 cycles on stability of genomic DNA using pulsed field gel electrophoresis. *Biopreserv.*  
637 *Biobank*. **10**, 4–11 (2012).
- 638 23. Schroeder, A. *et al.* The RIN: an RNA integrity number for assigning integrity values to  
639 RNA measurements. *BMC Mol. Biol.* **7**, 3 (2006).
- 640 24. Reiman, M., Laan, M., Rull, K. & Söber, S. Effects of RNA integrity on transcript  
641 quantification by total RNA sequencing of clinically collected human placental samples.  
642 *FASEB J.* **31**, 3298–3308 (2017).
- 643 25. Shen, Y. *et al.* Impact of RNA integrity and blood sample storage conditions on the gene  
644 expression analysis. *Onco. Targets. Ther.* **11**, 3573 (2018).
- 645 26. Sonntag, K.-C. *et al.* Limited predictability of postmortem human brain tissue quality by  
646 RNA integrity numbers. *J. Neurochem.* **138**, 53 (2016).
- 647 27. Yu, K. *et al.* Effect of multiple cycles of freeze–thawing on the RNA quality of lung cancer  
648 tissues. *Cell and Tissue Banking* vol. 18 433–440 (2017).
- 649 28. Jaffe, A. E. *et al.* qSVA framework for RNA quality correction in differential expression  
650 analysis. *Proc. Natl. Acad. Sci. U. S. A.* **114**, 7130 (2017).
- 651 29. Bao, W.-G. *et al.* Biobanking of Fresh-frozen Human Colon Tissues: Impact of Tissue Ex-  
652 vivo Ischemia Times and Storage Periods on RNA Quality. *Ann. Surg. Oncol.* **20**, 1737–  
653 1744 (2012).
- 654 30. Zeugner, S., Mayr, T., Zietz, C., Aust, D. E. & Baretton, G. B. RNA Quality in Fresh-  
655 Frozen Gastrointestinal Tumor Specimens—Experiences from the Tumor and Healthy  
656 Tissue Bank TU Dresden. in *Pre-Analytics of Pathological Specimens in Oncology* 85–93

- 657 (Springer, Cham, 2015).
- 658 31. Li, J., Jiang, H. & Wong, W. H. Modeling non-uniformity in short-read rates in RNA-Seq  
659 data. *Genome Biology* **11**, (2010).
- 660 32. Hoen, P. A. C. *et al.* Reproducibility of high-throughput mRNA and small RNA sequencing  
661 across laboratories. *Nat. Biotechnol.* **31**, 1015–1022 (2013).
- 662 33. Thompson, K. L., Scott Pine, P., Rosenzweig, B. A., Turpaz, Y. & Retief, J.  
663 Characterization of the effect of sample quality on high density oligonucleotide microarray  
664 data using progressively degraded rat liver RNA. *BMC Biotechnol.* **7**, 57 (2007).
- 665 34. Zhao, S., Zhang, Y., Gamini, R., Zhang, B. & von Schack, D. Evaluation of two main  
666 RNA-seq approaches for gene quantification in clinical RNA sequencing: polyA<sup>+</sup> selection  
667 versus rRNA depletion. *Sci. Rep.* **8**, 1–12 (2018).
- 668 35. Sultan, M. *et al.* Influence of RNA extraction methods and library selection schemes on  
669 RNA-seq data. *BMC Genomics* **15**, 675 (2014).
- 670 36. Zhao, W. *et al.* Comparison of RNA-Seq by poly (A) capture, ribosomal RNA depletion,  
671 and DNA microarray for expression profiling. *BMC Genomics* **15**, (2014).
- 672 37. Zhu, Y., Davis, S., Stephens, R., Meltzer, P. S. & Chen, Y. GEOmetadb: powerful  
673 alternative search engine for the Gene Expression Omnibus. *Bioinformatics* **24**, 2798–2800  
674 (2008).
- 675 38. McIntyre, L. M. *et al.* RNA-seq: technical variability and sampling. *BMC Genomics* **12**, 1–  
676 13 (2011).
- 677 39. Hansen, K. D., Irizarry, R. A. & Wu, Z. Removing technical variability in RNA-seq data  
678 using conditional quantile normalization. *Biostatistics* **13**, 204–216 (2012).
- 679 40. Leek, J. T., Evan Johnson, W., Parker, H. S., Jaffe, A. E. & Storey, J. D. The sva package

- 680 for removing batch effects and other unwanted variation in high-throughput experiments.  
681 *Bioinformatics* vol. 28 882–883 (2012).
- 682 41. Copois, V. *et al.* Impact of RNA degradation on gene expression profiles: assessment of  
683 different methods to reliably determine RNA quality. *J. Biotechnol.* **127**, 549–559 (2007).
- 684 42. Adiconis, X. *et al.* Comparative analysis of RNA sequencing methods for degraded or low-  
685 input samples. *Nat. Methods* **10**, 623–629 (2013).
- 686 43. Pertea, M. *et al.* Thousands of large-scale RNA sequencing experiments yield a  
687 comprehensive new human gene list and reveal extensive transcriptional noise. *bioRxiv*  
688 332825 (2018) doi:10.1101/332825.
- 689 44. Wang, L. *et al.* Measure transcript integrity using RNA-seq data. *BMC Bioinformatics* **17**,  
690 58 (2016).
- 691 45. Foley, J. W. *et al.* Gene expression profiling of single cells from archival tissue with laser-  
692 capture microdissection and Smart-3SEQ. *Genome Research* vol. 29 1816–1825 (2019).
- 693 46. Wang, Y. *et al.* Precision and functional specificity in mRNA decay. *Proceedings of the*  
694 *National Academy of Sciences* vol. 99 5860–5865 (2002).
- 695 47. Yang, E. *et al.* Decay rates of human mRNAs: correlation with functional characteristics  
696 and sequence attributes. *Genome Res.* **13**, 1863–1872 (2003).
- 697 48. Narsai, R. *et al.* Genome-wide analysis of mRNA decay rates and their determinants in  
698 *Arabidopsis thaliana*. *Plant Cell* **19**, 3418–3436 (2007).
- 699 49. Feng, H., Zhang, X. & Zhang, C. mRIN for direct assessment of genome-wide and gene-  
700 specific mRNA integrity from large-scale RNA-sequencing data. *Nat. Commun.* **6**, 7816  
701 (2015).
- 702 50. Wang, Y. *et al.* The Impact of Different Preservation Conditions and Freezing-Thawing

- 703 Cycles on Quality of RNA, DNA, and Proteins in Cancer Tissue. *Biopreserv. Biobank.* **13**,  
704 335–347 (2015).
- 705 51. Gazestani, V. H. *et al.* A perturbed gene network containing PI3K/AKT, RAS/ERK,  
706 WNT/ $\beta$ -catenin pathways in leukocytes is linked to ASD genetics and symptom severity.  
707 *bioRxiv* 435917 (2019) doi:10.1101/435917.
- 708 52. Bolger, A. M., Lohse, M. & Usadel, B. Trimmomatic: a flexible trimmer for Illumina  
709 sequence data. *Bioinformatics* **30**, 2114 (2014).
- 710 53. Li, H. *et al.* The Sequence Alignment/Map format and SAMtools. *Bioinformatics* **25**, 2078–  
711 2079 (2009).
- 712 54. Anders, S., Pyl, P. T. & Huber, W. HTSeq--a Python framework to work with high-  
713 throughput sequencing data. *Bioinformatics* **31**, 166–169 (2015).
- 714 55. Pramparo, T. *et al.* Prediction of autism by translation and immune/inflammation  
715 coexpressed genes in toddlers from pediatric community practices. *JAMA Psychiatry* **72**,  
716 386–394 (2015).
- 717 56. Collado-Torres, L. *et al.* Reproducible RNA-seq analysis using recount2. *Nat. Biotechnol.*  
718 **35**, 319–321 (2017).
- 719 57. Wang, L., Wang, S. & Li, W. RSeQC: quality control of RNA-seq experiments.  
720 *Bioinformatics* **28**, 2184–2185 (2012).
- 721
